# Supplementary material
Source: publisher figshare collection journal article supplement (https://acs.figshare.com/ndownloader/files/4585156)
Supplement: Supplementary file 1 [file 4585156]

# Kinetically-determined crystal structures of undoped and $\text{La}^{3+}$ -doped $\text{LnF}_3$

*Cunhai Dong<sup>†</sup>, Mati Raudsepp<sup>‡</sup> and Frank C.J.M. van Veggel<sup>\*†</sup>*

Department of Chemistry, the University of Victoria, P.O. Box 3065, Victoria, British Columbia,  
Canada, V8W 3V6, Department of Earth and Ocean Sciences, the University of British  
Columbia, Vancouver, British Columbia, Canada, V6T 1Z4

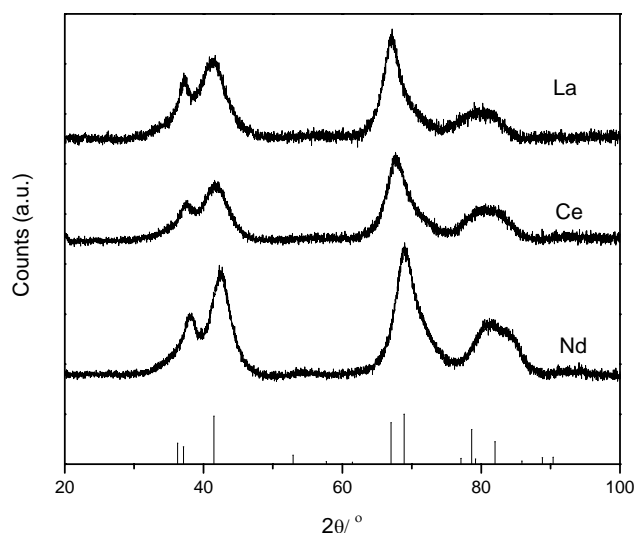

**Figure S1.** Comparison of XRD patterns of  $\text{LaF}_3$ ,  $\text{CeF}_3$ , and  $\text{NdF}_3$  nanoparticles with all the Bragg reflections of  $\text{LaF}_3$  (vertical lines at the bottom).

---

\* Corresponding author. E-mail: [fvv@uvic.ca](mailto:fvv@uvic.ca)

<sup>†</sup> University of Victoria

<sup>‡</sup> University of British Columbia

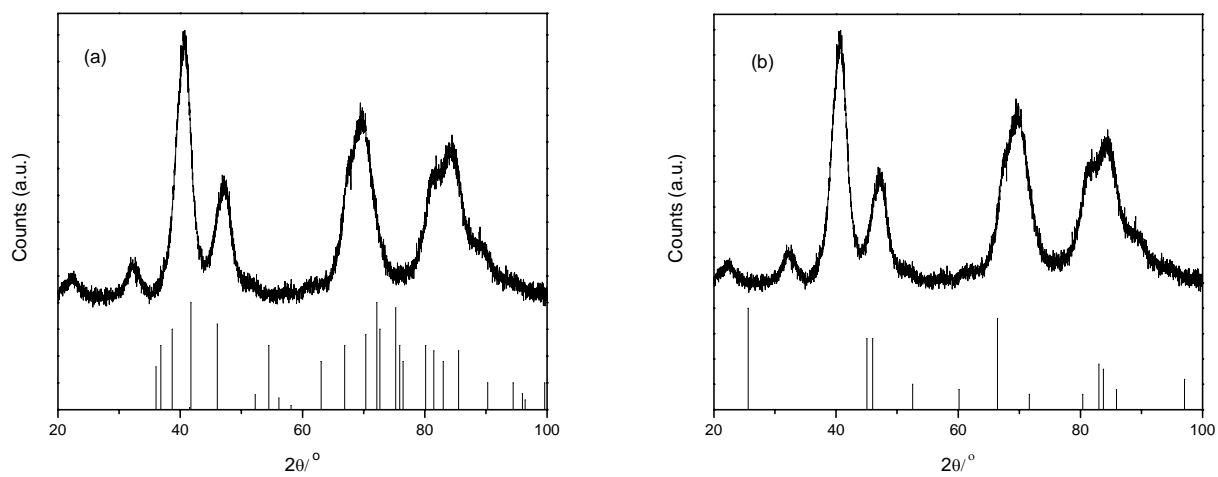

**Figure S2.** Comparison of XRD pattern of dysprosium fluoride nanoparticles with all the Bragg reflections of (a)  $\text{DyF}_3$  and (b) stoichiometric  $\text{NaDyF}_4$  (vertical lines at the bottom).

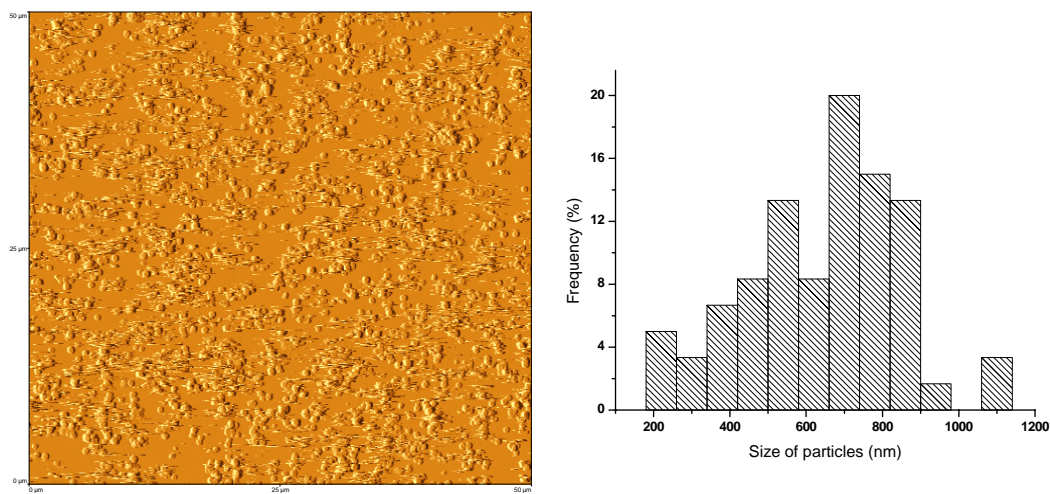

**Figure S3.** AFM image and size distribution of the submicron-sized  $\text{GdF}_3$  particles

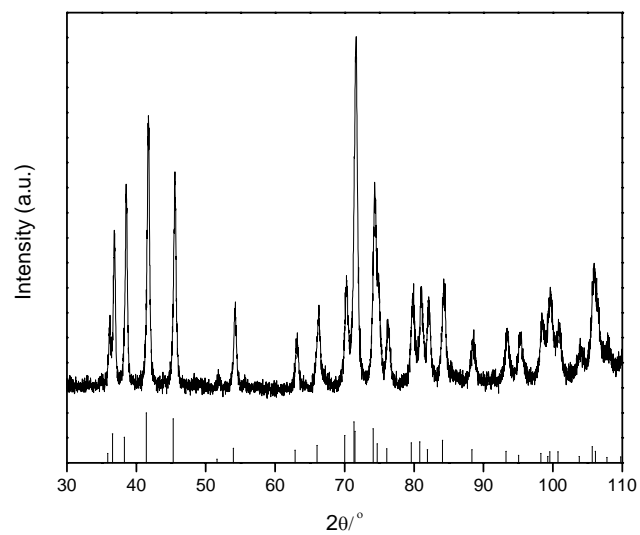

**Figure S4.** XRD pattern of the baked sub-micro GdF<sub>3</sub> particles (vertical bars at bottom are positions of all the Bragg reflections for the orthorhombic GdF<sub>3</sub>).

## Calculation of the lattice energies of $\text{LnF}_3$

The lattice energies of  $\text{LnF}_3$  were calculated using the Born-Haber cycle (Figure S5).

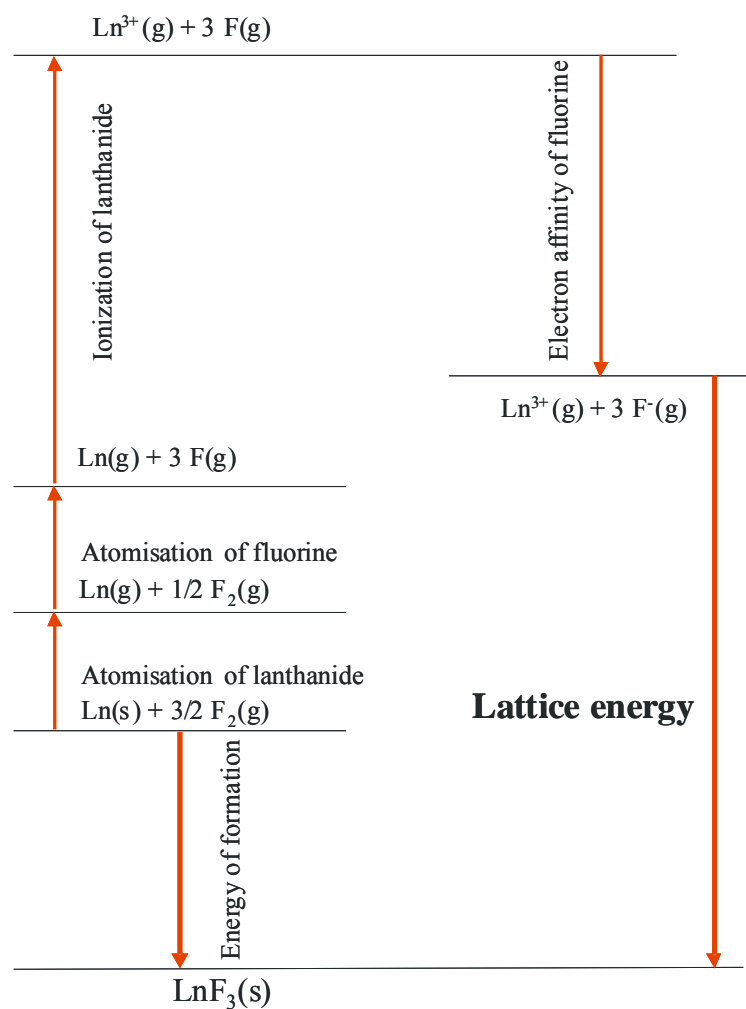

**Figure S5.** Born-Haber cycle used to calculate the lattice energies of  $\text{LnF}_3$

From the above diagram, the following formula is deduced:

$$\Delta H_f = V + \frac{3}{2}B + IE_M - 3EA_x - U_L$$

$\Delta H_f$  is the standard enthalpy of formation

$V$  is the heat of sublimation of Ln metal

$IE_M$  is the ionization energy of Ln

$EA_x$  is the electron affinity of  $F_2$

$B$  is the bond energy of  $F_2$

$U_L$  is the lattice energy

Using this formula, the lattice energies of  $LnF_3$  are calculated and tabulated in Table S1.

**Table S1.** Data from literature<sup>1-3</sup> and calculated lattice energies of  $LnF_3$  (unit: kJ/mol)

|         | $\Delta H_f$<br>Standard<br>enthalpy of<br>formation | $V$<br>Heat of<br>sublimation<br>of Ln metal | $IE_M$<br>Ionization<br>energy of<br>Ln | $EA_x$<br>electron<br>affinity<br>of $F_2$ | $B$<br>bond<br>energy<br>of $F_2$ | $U_L$<br>Lattice<br>energy |
|---------|------------------------------------------------------|----------------------------------------------|-----------------------------------------|--------------------------------------------|-----------------------------------|----------------------------|
| $LaF_3$ | 1701                                                 | 431                                          | 3474                                    | 328                                        | 159                               | 4861                       |
| $CeF_3$ | 1703                                                 | 423                                          | 3549                                    |                                            |                                   | 4930                       |
| $PrF_3$ | 1691                                                 | 356                                          | 3650                                    |                                            |                                   | 4952                       |
| $NdF_3$ | 1681                                                 | 328                                          | 3719                                    |                                            |                                   | 4983                       |
| $SmF_3$ | 1669                                                 | 207                                          | 3904                                    |                                            |                                   | 5035                       |
| $EuF_3$ | 1571                                                 | 175                                          | 4055                                    |                                            |                                   | 5056                       |
| $GdF_3$ | 1700                                                 | 398                                          | 3769                                    |                                            |                                   | 5122                       |
| $TbF_3$ | 1708                                                 | 389                                          | 3810                                    |                                            |                                   | 5162                       |
| $DyF_3$ | 1693                                                 | 290                                          | 3927                                    |                                            |                                   | 5165                       |
| $HoF_3$ | 1698                                                 | 301                                          | 3949                                    |                                            |                                   | 5203                       |
| $ErF_3$ | 1694                                                 | 317                                          | 3953                                    |                                            |                                   | 5219                       |
| $TmF_3$ | 1695                                                 | 232                                          | 4046                                    |                                            |                                   | 5228                       |
| $YbF_3$ | 1630                                                 | 152                                          | 4215                                    |                                            |                                   | 5252                       |
| $LuF_3$ | 1701                                                 | 428                                          | 3924                                    |                                            |                                   | 5308                       |

## Data processing for the thermodynamic cycle in Figure 9

### *Calculations of lattice energies of $\text{La}^{3+}$ doped $\text{GdF}_3$ nanoparticles*

To calculate the lattice energies of the doped materials, because the trigonal  $\text{LaF}_3$  and the orthorhombic  $\text{GdF}_3$  have different crystal structures, it is not correct to do a simple weighed average of them. Thus the lattice energies of “trigonal”  $\text{GdF}_3$  and “orthorhombic”  $\text{LaF}_3$  were calculated by using a least square fit and linearly extrapolating the lattice energies of  $\text{LaF}_3$  to  $\text{SmF}_3$  and of  $\text{LuF}_3$  to  $\text{EuF}_3$ , respectively. The calculated lattice energies of the “trigonal”  $\text{GdF}_3$  and the “orthorhombic”  $\text{LaF}_3$  are 5108 kJ/mol, and 4926 kJ/mol, respectively. Specially, the lattice energy of the “trigonal”  $\text{GdF}_3$  is very close to that of the orthorhombic  $\text{GdF}_3$ , 5122 kJ/mol (the difference is  $< 0.3\%$ ), suggesting the possibility of  $\text{GdF}_3$  having two phases. To calculate the lattice energies of the doped materials, weighed averaging was applied to the trigonal  $\text{LaF}_3$  and the “trigonal”  $\text{GdF}_3$  for an assumed trigonal phase, as well as to the “orthorhombic”  $\text{LaF}_3$  and the orthorhombic  $\text{GdF}_3$  for an assumed orthorhombic phase. The calculated lattice energies are tabulated in Table S2.

**Table S2.** The calculated lattice energies of  $\text{La}^{3+}$  doped  $\text{GdF}_3$ . (unit: kJ/mol)

| $\text{La}^{3+}$ doping level in $\text{GdF}_3$ | Lattice energies of $\text{La}^{3+}$ doped $\text{GdF}_3$ |                                |
|-------------------------------------------------|-----------------------------------------------------------|--------------------------------|
|                                                 | If orthorhombic structure is taken                        | If trigonal structure is taken |
| 5%                                              | 5112.2                                                    | 4873.4                         |
| 10%                                             | 5102.4                                                    | 4885.7                         |
| 15%                                             | 5092.6                                                    | 4898.1                         |
| 20%                                             | 5082.8                                                    | 4910.4                         |
| 50%                                             | 5024.0                                                    | 4984.5                         |
| 75%                                             | 4975.0                                                    | 5046.3                         |

### Hydration energies

In Figure 9a, hydration energy of  $F^-$  is -472 kJ/mol, that of  $La^{3+}$  is -3155 kJ/mol, and that of  $Gd^{3+}$  -3385 kJ/mol.<sup>3</sup>

### Entropies

All the standard entropies are available in the literature,<sup>1,3</sup> and the following equation was used to calculate the entropy change. The calculated entropy changes are tabulated in Table S3.

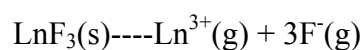

**Table S3.** The standard entropies and the entropy changes of  $LaF_3$  and  $GdF_3$  (unit: J/mol·K)

|         | Standard Entropy of $LnF_3$ (s) | Standard entropy of $La^{3+}$ (g) | Standard entropy of $F^-$ (g) | Standard entropy change ( $\Delta S^0$ ) |
|---------|---------------------------------|-----------------------------------|-------------------------------|------------------------------------------|
| $LaF_3$ | 107                             | 171                               | 146                           | 502                                      |
| $GdF_3$ | 117                             | 189                               |                               | 510                                      |

A weighed average of the standard entropy changes of  $LaF_3$  and  $GdF_3$  was used for the thermodynamic cycle.

**Table S4.** The calculated Gibbs free energies based on the thermodynamic cycle. (unit: kJ/mol)

| La <sup>3+</sup> doping level in GdF <sub>3</sub> | $\Delta G_{\text{reac.}}^0$ If orthorhombic structure is taken | $\Delta G_{\text{reac.}}^0$ If trigonal structure is taken |
|---------------------------------------------------|----------------------------------------------------------------|------------------------------------------------------------|
| 5%                                                | -180.7                                                         | +68.2                                                      |
| 10%                                               | -172.4                                                         | +44.3                                                      |
| 15%                                               | -174.1                                                         | +20.5                                                      |
| 20%                                               | -175.8                                                         | -3.4                                                       |
| 50%                                               | -186.0                                                         | -146.0                                                     |
| 75%                                               | -194.5                                                         | -265.5                                                     |

The data in Table S4 were used to make the plot in Figure 9b.

## References

- (1) *Handbook on the physics and chemistry of rare earths*; Elsevier North-Holland: Amsterdam, 1982; Vol. 5.
- (2) Lide, D. R. *Handbook of Chemistry and Physics*; CRC press: Boca Raton, 1996.
- (3) Marcus, Y. *Ion Properties*; Marcel Dekker: New York, 1997.
